# Supplementary material
Source: MDPI journal article supplement (https://www.mdpi.com/1424-8247/16/7/1027)
Supplement: s1 [file s1]

## Supporting Information

# **Quaternary ammonium palmitoyl glycol chitosan (GCPQ) loaded with platinum-based anticancer agents – a novel polymer formulation for anticancer therapy**

Yvonne Lerchbammer-Kreith <sup>1</sup>, Michaela Hejl <sup>1</sup>, Nadine S. Sommerfeld <sup>1</sup>, Xian Weng-Jiang <sup>2</sup>,  
Uchechukwu Odunze <sup>2</sup>, Ryan D. Mellor <sup>2</sup>, David G. Workman <sup>2</sup>, Michael A. Jakupiec<sup>1,3</sup>,  
Andreas G. Schätzlein <sup>2</sup>, Ijeoma F. Uchegbu <sup>2,\*</sup>, Mathea S. Galanski <sup>1,\*</sup>, Bernhard K. Keppler <sup>1,3</sup>

<sup>1</sup>University of Vienna, Faculty of Chemistry, Institute of Inorganic Chemistry, Waehringer  
Strasse 42, 1090 Vienna, Austria

<sup>2</sup>University College London, School of Pharmacy, Brunswick Square 29-39, WC1N 1AX  
London, United Kingdom

<sup>3</sup>Research Cluster “Translational Cancer Therapy Research”, University of Vienna,  
Waehringer Strasse 42, 1090 Vienna, Austria

\*Corresponding authors: E-mail addresses: ijeoma.uchegbu@ucl.ac.uk (I.F.U.);  
mathea.galanski@univie.ac.at (M.S.G.)

# Table of Contents

|                                                    |    |
|----------------------------------------------------|----|
| 1. $^1\text{H}$ NMR spectrum of GCPQ polymer ..... | 3  |
| 2. Selected NMR spectra of conjugates .....        | 4  |
| 3. Concentration-effect curves.....                | 8  |
| 4. Solubility data .....                           | 12 |
| 5. References .....                                | 13 |

## 1. $^1\text{H}$ NMR spectrum of GCPQ polymer

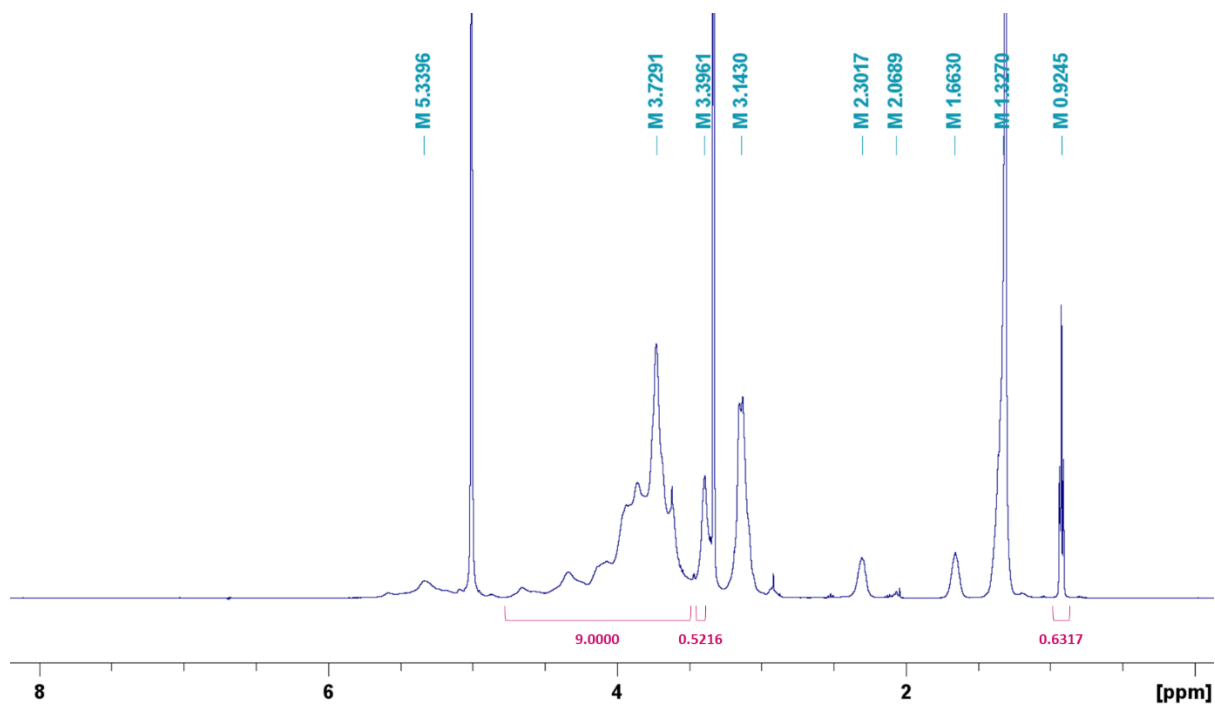

**Figure S1.**  $^1\text{H}$  NMR spectrum of polymer **GCP21Q12** in MeOD + 5 $\mu\text{L}$  DCl. The levels of palmitoylation and quaternisation were estimated by comparison of the integrals of palmitoyl methyl protons (0.92 ppm, 3H), quaternary ammonium protons (3.40 ppm, 9H, due to the partly overlapping MeOD signal, only half of the quaternary ammonium signal was integrated and accounted as 4.5 protons, provided a symmetrical resonance) and sugar backbone protons (3.54–4.75 ppm, 9H), respectively [1] .

## 2. Selected NMR spectra of conjugates

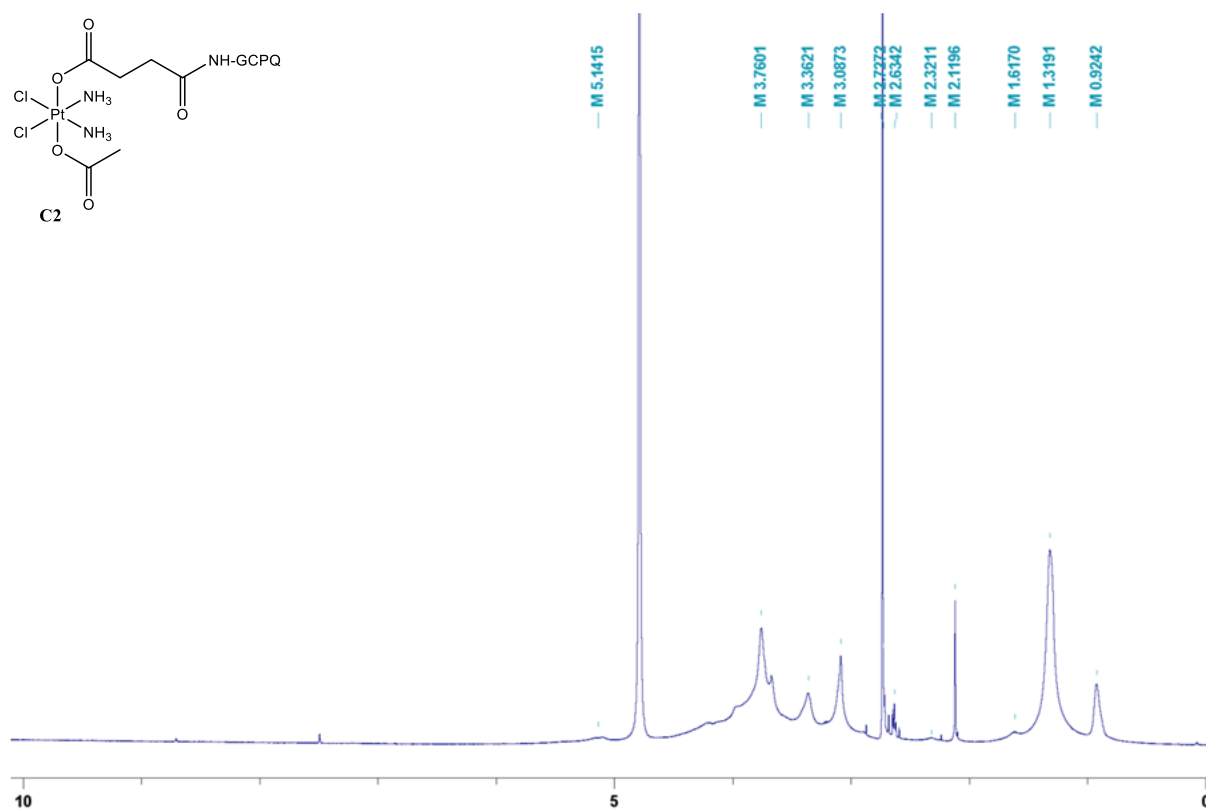

Figure S2. <sup>1</sup>H NMR spectrum of conjugate C2 in D<sub>2</sub>O

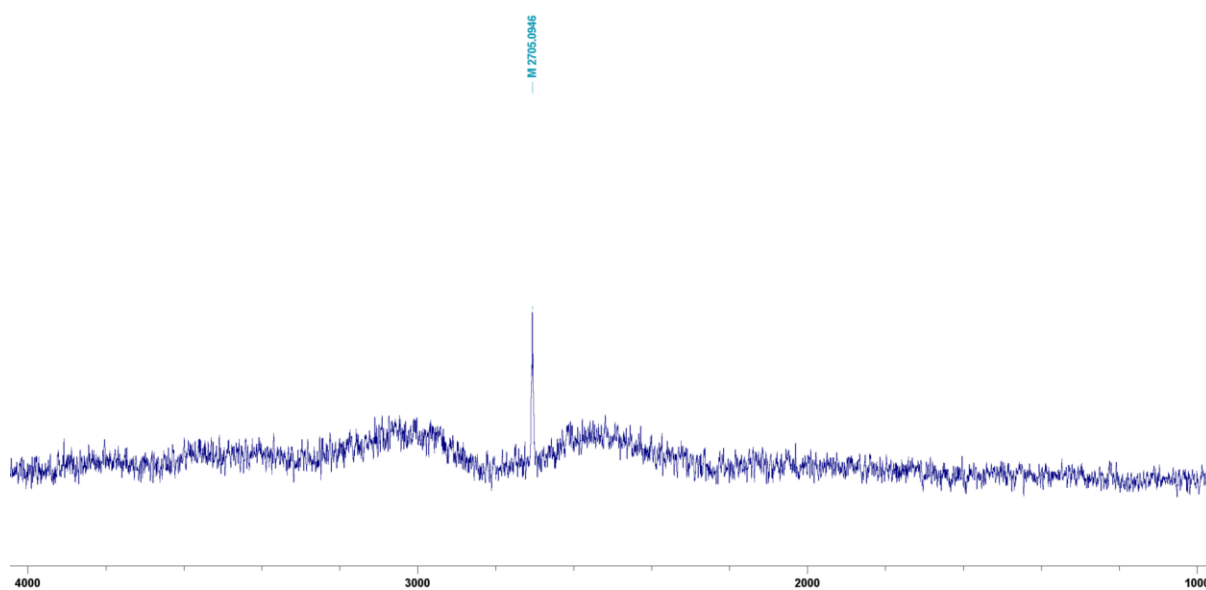

Figure S3. <sup>195</sup>Pt NMR spectrum of conjugate C2 in D<sub>2</sub>O.

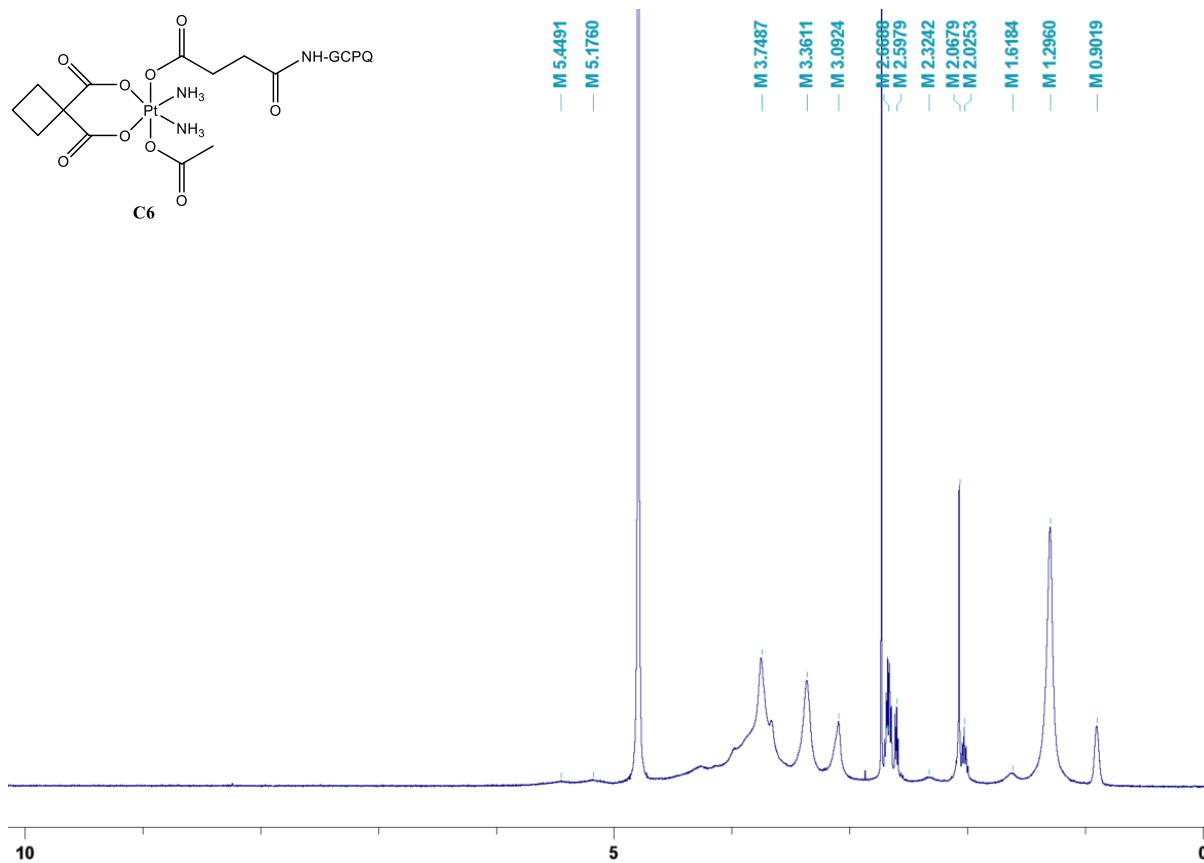

Figure S4. <sup>1</sup>H NMR spectrum of conjugate C6 in D<sub>2</sub>O.

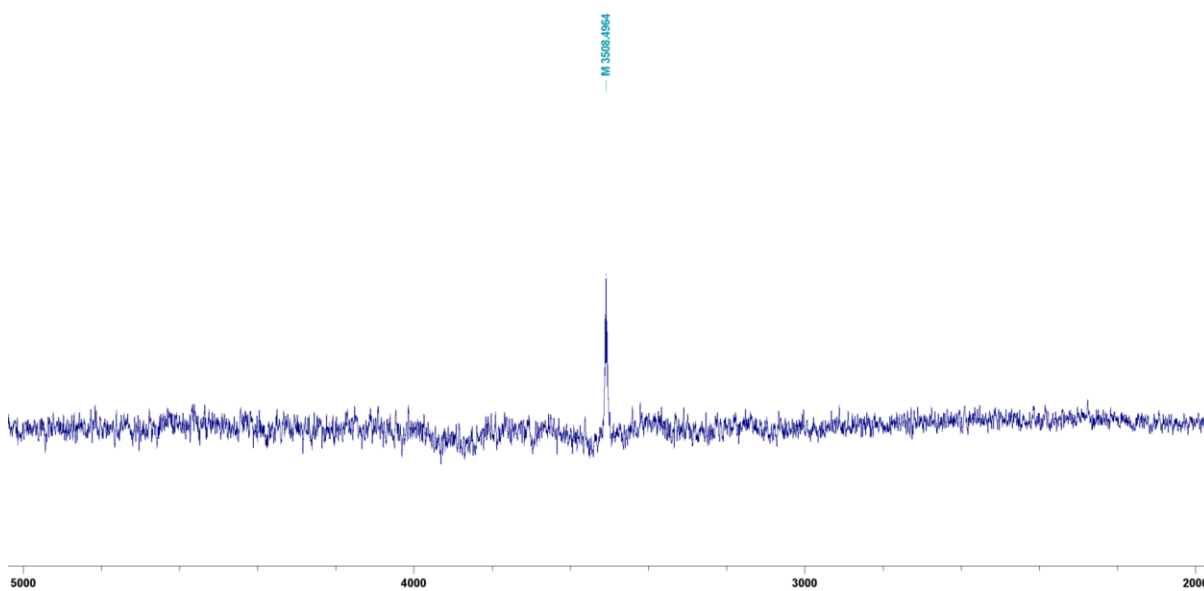

Figure S5. <sup>195</sup>Pt NMR spectrum of conjugate C6 in D<sub>2</sub>O.

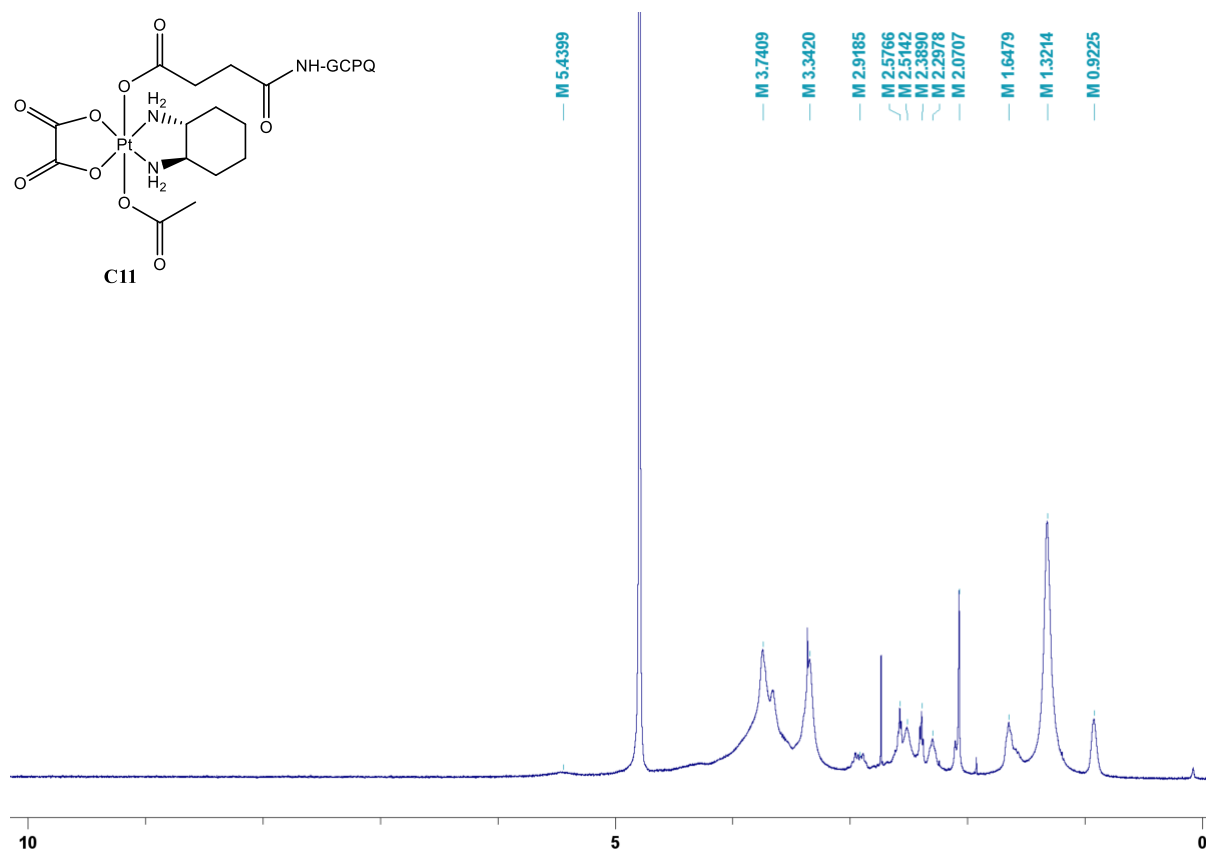

Figure S6.  $^1\text{H}$  NMR spectrum of conjugate C11 in  $\text{D}_2\text{O}$ .

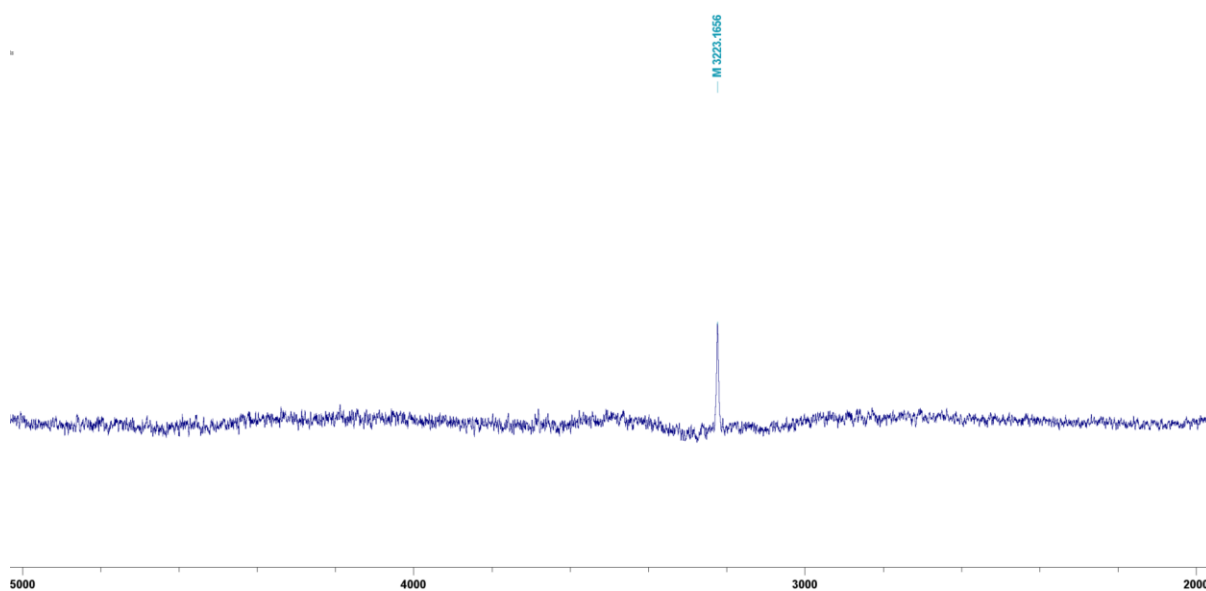

Figure S7.  $^{195}\text{Pt}$  NMR spectrum of conjugate C11 in  $\text{D}_2\text{O}$ .

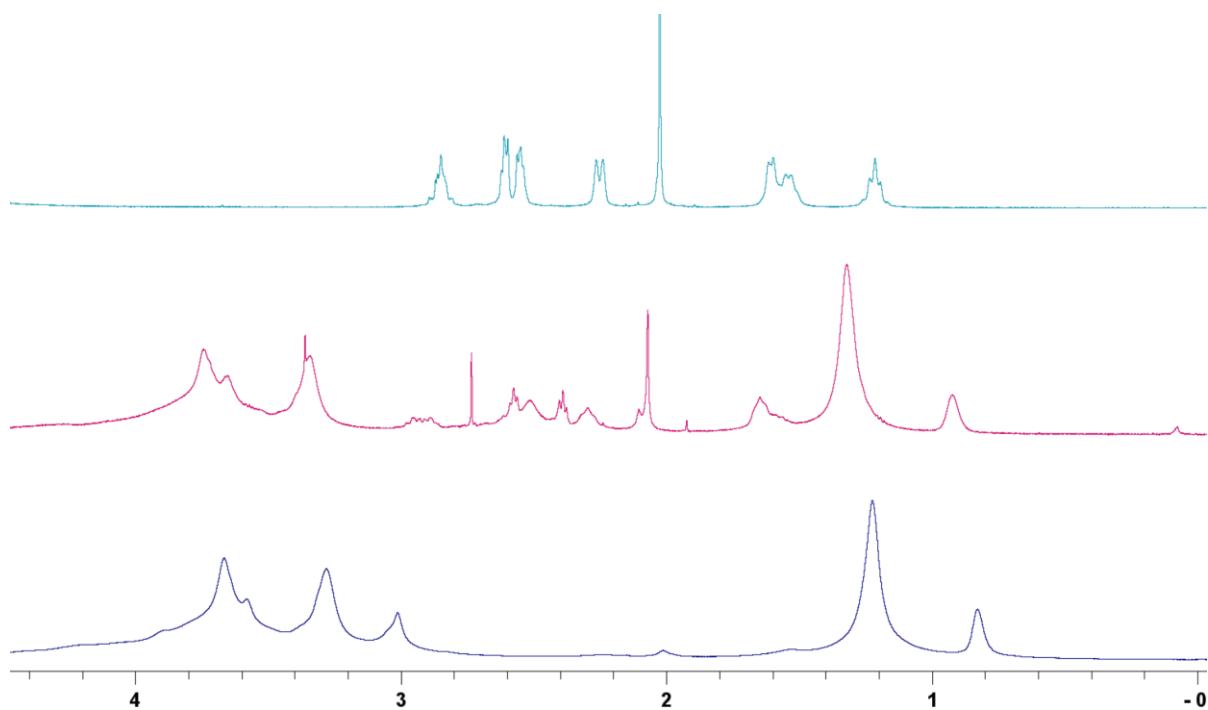

**Figure S8.** <sup>1</sup>H NMR spectra measured in D<sub>2</sub>O of platinum(IV) complex **3** (above), conjugate **C11** (middle) and GCP22Q33 polymer (below).

### 3. Concentration-effect curves

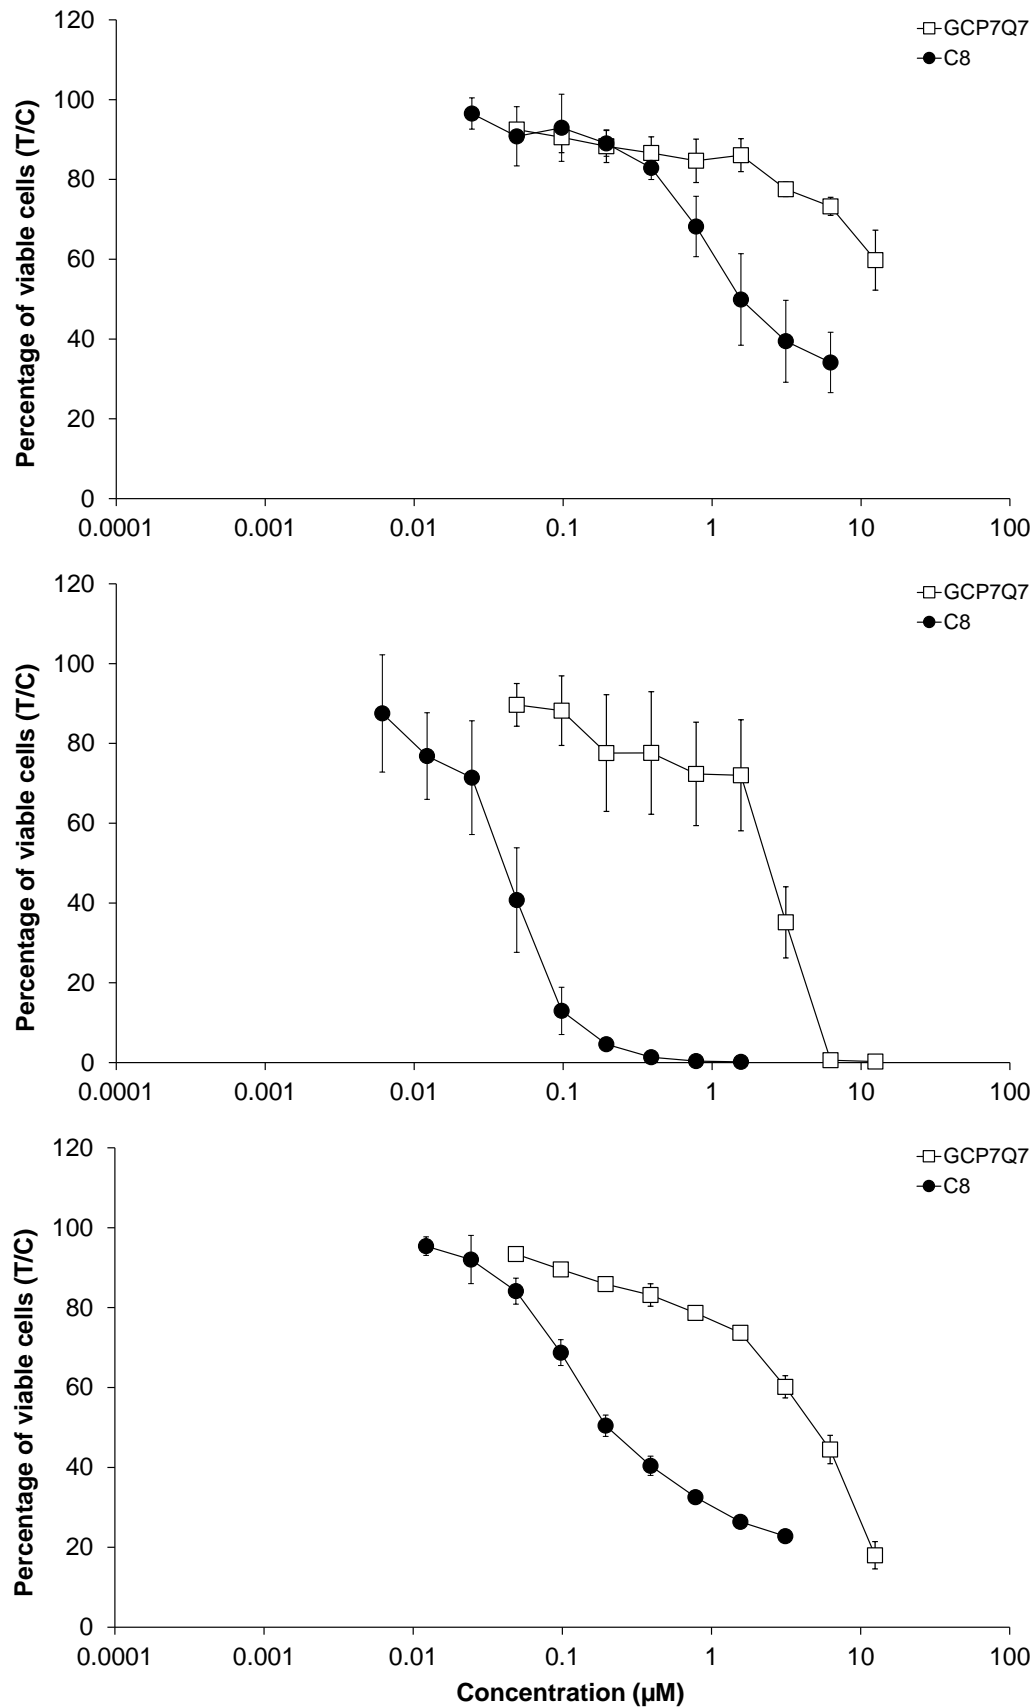

**Figure S9.** Concentration-effect curves of GCP7Q7 and C8 in A549 (top), CH1/PA-1 (middle) and SW480 (bottom) cells, obtained by MTT assays with 96 h exposure time. Values are means  $\pm$  standard deviations from at least three independent experiments.

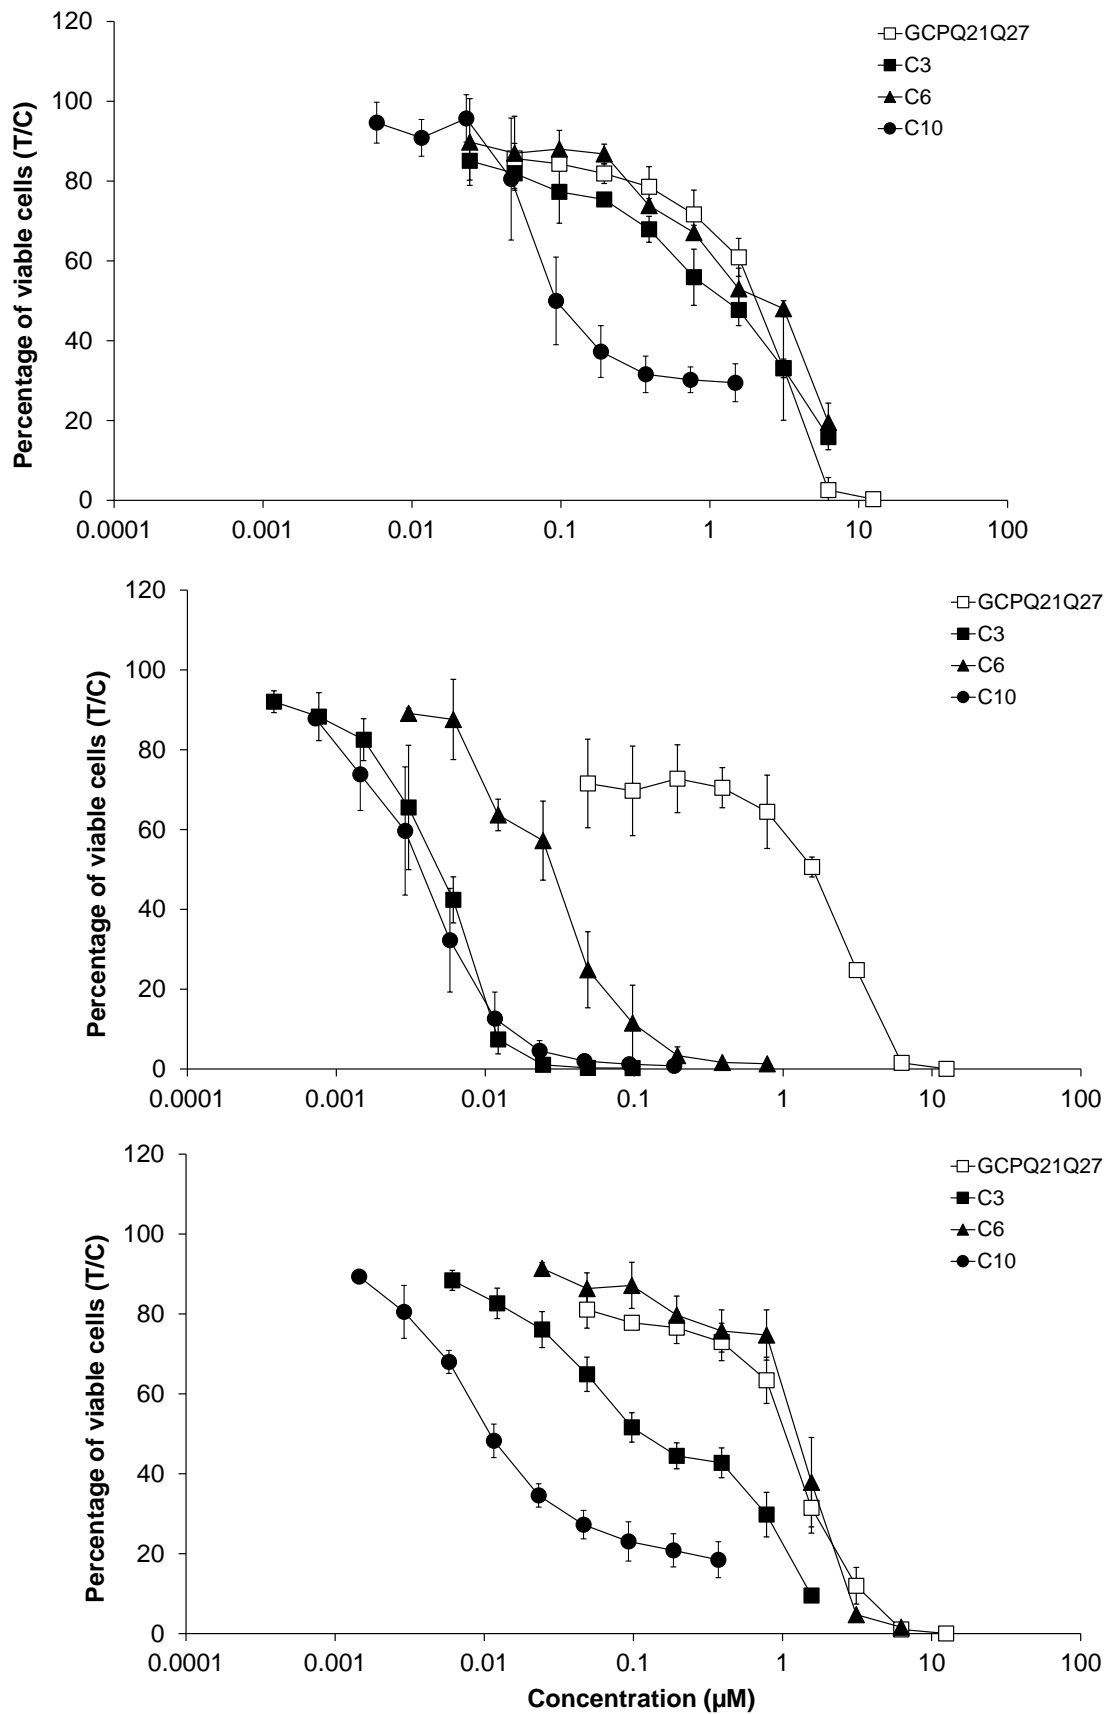

**Figure S10.** Concentration-effect curves of GCPQ21Q27, C3, C6 and C10 in A549 (top), CH1/PA-1 (middle) and SW480 (bottom) cells, obtained by MTT assays with 96 h exposure time. Values are means  $\pm$  standard deviations from at least three independent experiments.

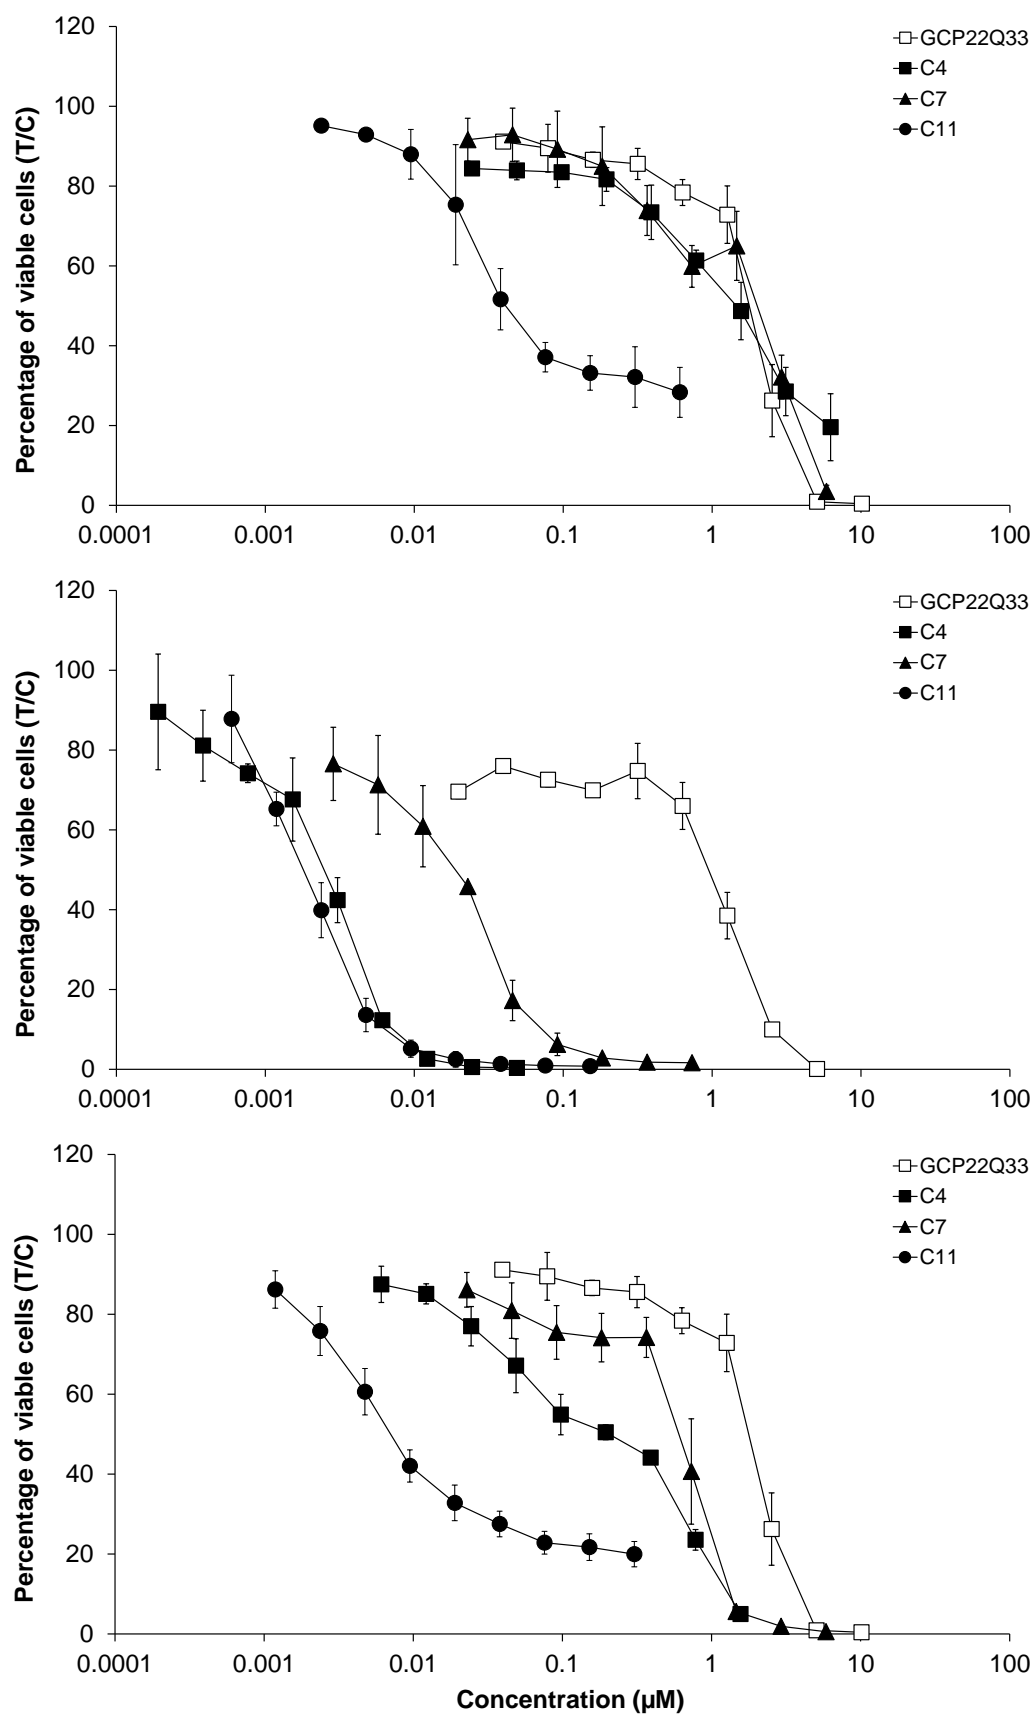

**Figure S11.** Concentration-effect curves of **GCP22Q33**, **C4**, **C7** and **C11** in A549 (top), CH1/PA-1 (middle) and SW480 (bottom) cells, obtained by MTT assays with 96 h exposure time. Values are means  $\pm$  standard deviations from at least three independent experiments.

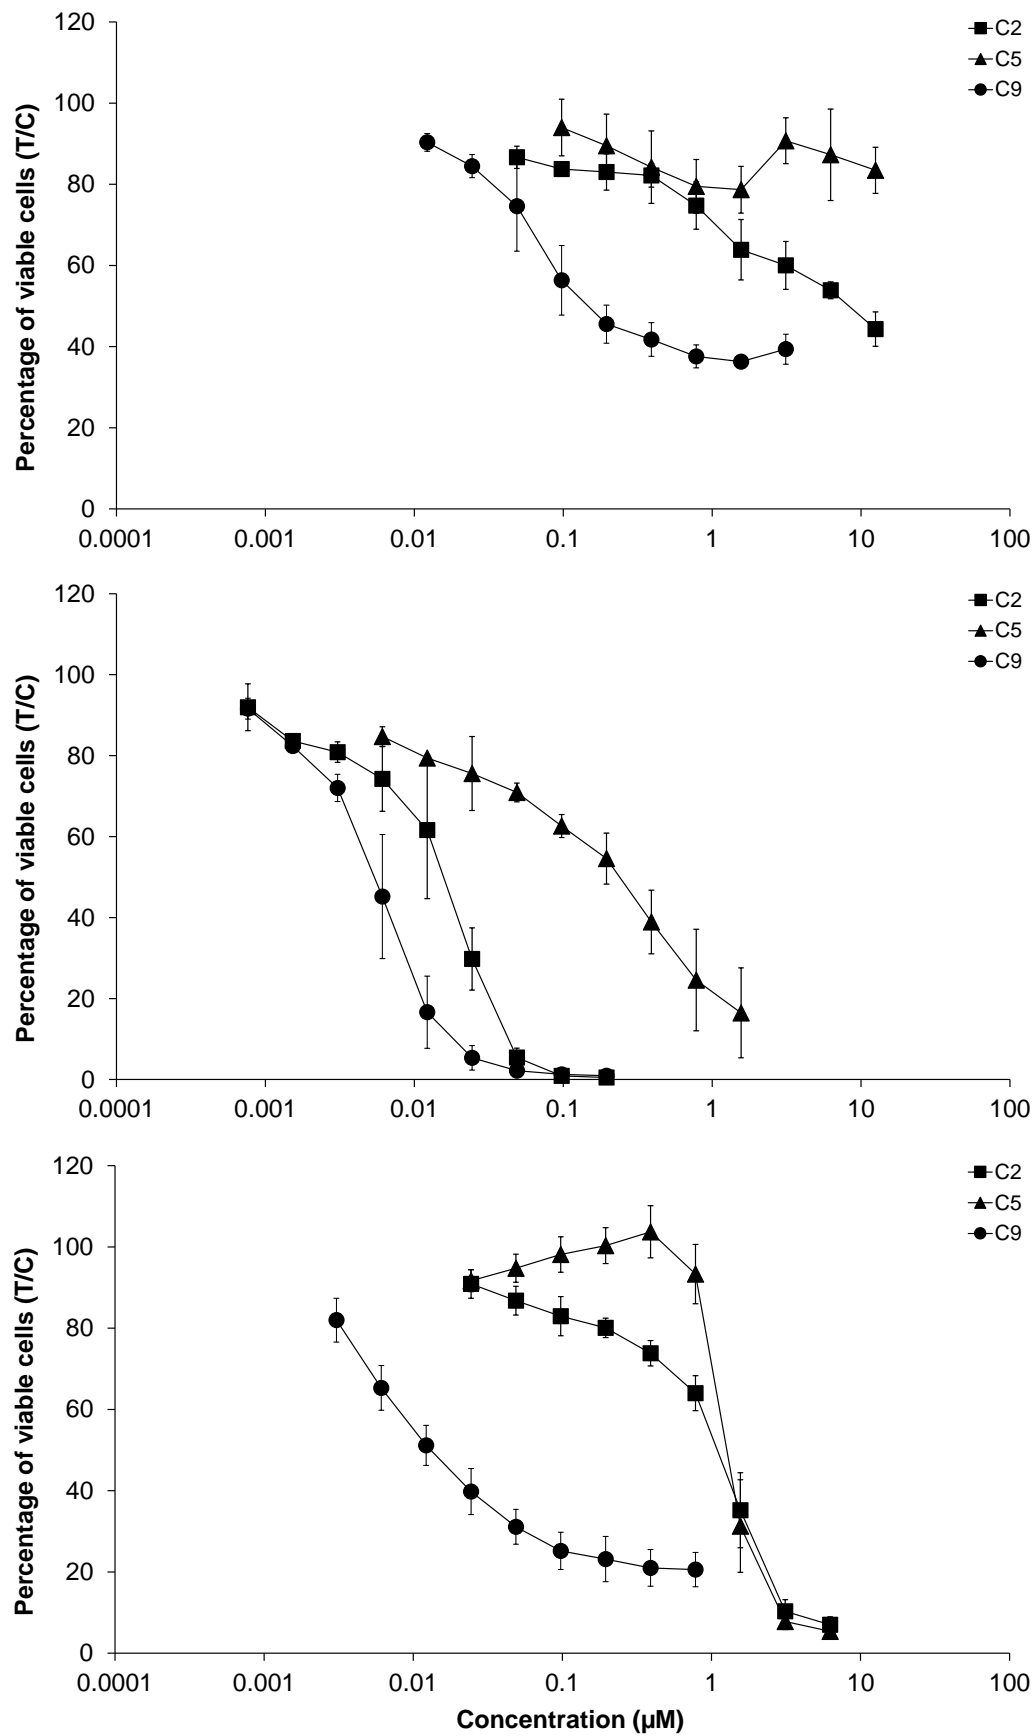

**Figure S12.** Concentration-effect curves of C2, C5 and C9 in A549 (top), CH1/PA-1 (middle) and SW480 (bottom) cells, obtained by MTT assays with 96 h exposure time. Values are means  $\pm$  standard deviations from at least three independent experiments.

## 4. Solubility data

**Table S1.** Overview of the water solubility of conjugates **C1-C11** measured by visual judgement in Milli-Q water at room temperature.

| Sample | Pt(IV) | GCPQ     | Water solubility [mg/mL] |
|--------|--------|----------|--------------------------|
| C1     | 1      | GCP7Q7   | ~1                       |
| C2     | 1      | GCP21Q12 | ~3                       |
| C3     | 1      | GCP21Q27 | ~4                       |
| C4     | 1      | GCP22Q33 | ~5.5                     |
| C5     | 2      | GCP21Q12 | ~3                       |
| C6     | 2      | GCP21Q27 | ~5                       |
| C7     | 2      | GCP22Q33 | ~6                       |
| C8     | 3      | GCP7Q7   | ~2                       |
| C9     | 3      | GCP21Q12 | ~4                       |
| C10    | 3      | GCP21Q27 | ~5                       |
| C11    | 3      | GCP22Q33 | ~6.5                     |

## 5. References

1. Uchegbu, I.F.; Sadiq, L.; Arastoo, M.; Gray, A.I.; Wang, W.; Waigh, R.D.; Schätzlein, A.G. Quaternary Ammonium Palmitoyl Glycol Chitosan-a New Polysoap for Drug Delivery. *Int J Pharm* **2001**, *224*, 185–199, doi:10.1016/s0378-5173(01)00763-3.
